# Supplementary material for: A Comparative Analysis of Floral Scent Compounds in Intraspecific Cultivars of Prunus mume with Different Corolla Colours
Source: PubMed Central journal article supplement (PMC6982963; doi:10.3390/molecules25010145), 2019-12-30
Supplement: molecules-25-00145-s001.pdf [file molecules-25-00145-s001.pdf]

## SUPPLEMENTARY INFO

### **A comparative analysis of floral scent compounds in intraspecific cultivars of**

### ***Prunus mume* with different corollas colours**

Tengxun Zhang<sup>1#</sup>, Fei Bao<sup>1#</sup>, Yongjuan Yang<sup>1</sup>, Ling Hu<sup>1</sup>, Anqi Ding<sup>1</sup>, Aiqin Ding<sup>1</sup>,  
Jia Wang<sup>1</sup>, Tangren Cheng<sup>1</sup> and Qixiang Zhang<sup>1\*</sup>

<sup>1</sup> Beijing Advanced Innovation Center for Tree Breeding by Molecular Design, Beijing Forestry University, Beijing, China; Beijing Key Laboratory of Ornamental Plants Germplasm Innovation & Molecular Breeding; National Engineering Research Center for Floriculture; Beijing Laboratory of Urban and Rural Ecological Environment; Key Laboratory of Genetics and Breeding in Forest Trees and Ornamental Plants of Ministry of Education; School of Landscape Architecture, Beijing Forestry University, Beijing, China

<sup>#</sup>These authors contributed equally to this work.

*Correspondence to:*

Qixiang Zhang

School of Landscape Architecture, Beijing Forestry University, Beijing 10083, China

e-mail: zqxbjfu@126.com

**Supplementary Table**

**Table S1.** Relative amounts (>0.1%) of floral scent compounds in the eight *P. mume* cultivars.

| Compounds                          | RI <sup>1</sup> | Relative amount [ mean ± SE (%) ] |            |            |                 |            |            |            |            |
|------------------------------------|-----------------|-----------------------------------|------------|------------|-----------------|------------|------------|------------|------------|
|                                    |                 | 'Fub'                             | 'Zah'      | 'Sub'      | 'Zao'           | 'Fenp'     | 'Jia'      | 'Fenh'     | 'Wuy'      |
| <b>Phenylpropanoids/Benzenoids</b> |                 |                                   |            |            |                 |            |            |            |            |
| Benzaldehyde                       | 982             | 0.85±0.11                         | 2.00±0.25  | 0.14±0.02  | 1.16±0.51       | 0.72±0.14  | 1.45±0.25  | 0.48±0.26  | 5.83±1.70  |
| 4-Methylanisole                    | 983             | 0.62±0.11                         | 0.56±0.16  | 0.53±0.05  | tr <sup>2</sup> | tr         | tr         | tr         | tr         |
| Benzyl alcohol                     | 1036            | 7.51±0.05                         | 4.56±0.08  | 2.53±0.49  | 7.23±1.87       | 23.49±0.95 | 75.43±2.83 | 13.60±2.57 | 10.45±3.56 |
| Methyl benzoate                    | 1060            | 0.70±0.32                         | 1.51±0.27  | 0.29±0.00  | 0.09±0.03       | tr         | 0.11±0.05  | 0.75±0.04  | 0.47±0.18  |
| Benzyl acetate                     | 1160            | 83.46±1.10                        | 86.02±2.06 | 87.26±2.39 | 84.02±6.24      | 34.23±2.14 | 0.84±0.25  | 68.52±0.55 | 0.21±0.03  |
| Creosol                            | 1203            | - <sup>3</sup>                    | 0.13±0.03  | -          | -               | -          | -          | 0.08±0.03  | -          |
| Methyl salicylate                  | 1281            | 0.12±0.06                         | -          | tr         | tr              | tr         | -          | tr         | -          |
| Estragole                          | 1172            | -                                 | -          | 0.10±0.04  | 0.09±0.01       | tr         | 0.13±0.01  | tr         | 7.14±2.05  |
| 3-Phenylpropanol                   | 1235            | -                                 | -          | tr         | -               | 0.09±0.02  | 0.17±0.04  | -          | -          |
| Chavicol                           | 1203            | -                                 | -          | -          | -               | 0.75±0.22  | 0.21±0.08  | -          | 1.93±0.44  |
| <i>trans</i> -Cinnamaldehyde       | 1189            | -                                 | -          | -          | -               | 0.51±0.04  | 0.40±0.10  | -          | -          |
| Cinnamyl alcohol                   | 1243            | -                                 | -          | -          | -               | 6.81±0.32  | 6.66±1.39  | 0.88±0.24  | -          |
| Eugenol                            | 1392            | 3.53±0.74                         | 3.08±0.77  | 7.17±0.02  | 4.49±1.80       | 13.63±0.73 | 13.24±1.40 | 7.00±1.88  | 66.59±3.47 |
| Benzenepropyl acetate              | 1359            | -                                 | -          | -          | -               | 0.92±0.16  | 0.08±0.04  | 0.34±0.11  | 0.35±0.16  |
| Methyleugenol                      | 1361            | tr                                | 0.13±0.03  | 0.17±0.01  | tr              | 0.09±0.03  | 0.16±0.06  | tr         | 3.36±0.72  |
| Cinnamyl acetate                   | 1367            | -                                 | -          | -          | -               | 18.14±2.71 | 0.08±0.03  | 7.80±1.07  | -          |
| Benzyl benzoate                    | 1733            | 0.68±0.17                         | 0.71±0.22  | 1.33±0.08  | -               | -          | -          | -          | -          |
| <b>Fatty acid derivatives</b>      |                 |                                   |            |            |                 |            |            |            |            |
| 3-Hexanol                          | 780             | tr                                | tr         | tr         | -               | tr         | tr         | tr         | 0.52±0.14  |
| 2-Hexanol                          | 780             | tr                                | 0.11±0.02  | tr         | -               | tr         | 0.11±0.06  | tr         | 0.61±0.11  |
| (4E)-4-Hexenyl acetate             | 992             | 0.30±0.06                         | 0.31±0.09  | 0.27±0.07  | tr              | -          | -          | 0.23±0.06  | -          |
| Cyclohexyl acetate                 | 1047            | 0.63±0.22                         | 0.43±0.10  | 0.43±0.13  | 0.17±0.08       | tr         | -          | 0.23±0.08  | -          |
| 2-Hexenyl acetate                  | 992             | 0.24±0.08                         | 0.81±0.22  | 0.43±0.07  | 0.18±0.03       | -          | -          | 0.11±0.01  | -          |
| Ethylhexanol                       | 995             | -                                 | -          | 0.29±0.02  | -               | tr         | -          | -          | 0.48±0.01  |
| 1-Octanol                          | 1059            | tr                                | tr         | tr         | tr              | 0.38±0.04  | 0.58±0.31  | -          | tr         |
| Nonanal                            | 1104            | tr                                | tr         | tr         | tr              | tr         | tr         | -          | 0.58±0.24  |

|                     |      |           |           |           |    |           |           |           |           |
|---------------------|------|-----------|-----------|-----------|----|-----------|-----------|-----------|-----------|
| Ethyl hexyl acetate | 1118 | tr        | tr        | 0.24±0.07 | tr | -         | -         | tr        | -         |
| Octyl acetate       | 1183 | 0.33±0.16 | -         | 0.20±0.04 | -  | 0.09±0.01 | -         | -         | -         |
| <b>Terpenoids</b>   |      |           |           |           |    |           |           |           |           |
| D-Limonene          | 1018 | -         | tr        | -         | tr | -         | tr        | tr        | 0.11±0.13 |
| Menthol             | 1164 | -         | -         | -         | -  | -         | -         | -         | 0.50±0.06 |
| Dihydro-β-ionone    | 1449 | 0.08±0.04 | 0.06±0.02 | -         | tr | -         | -         | tr        | 0.19±0.04 |
| β-Ionone            | 1457 | 0.19±0.07 | tr        | -         | tr | 0.09±0.06 | 0.27±0.02 | 0.07±0.03 | tr        |
